# Supplementary material
Source: PubMed Central journal article supplement (PMC8964603)
Supplement: 431_2021_4345_MOESM1_ESM.pdf [file 431_2021_4345_MOESM1_ESM.pdf]

## Supplementary S1

### Questionnaire for SARS-CoV-2 children

1. Date for completion of the questionnaire?
2. Your child's birth date including year?
3. Gender of your child?
4. Has your child ever been tested positive for SARS-CoV-2 (corona virus)?
5. If "yes" in question 4: What date did your child have a positive corona test for the first time?
6. Does your child suffer from a chronic disease?
7. If "yes" in question 6: What chronic disease?
  - Respiratory disease such as asthma, cystic fibrosis, bronchitis
  - Immune deficiency (confirmed by doctor)
  - Cancer
  - Diabetes
  - Kidney disease
  - Abdominal disease
  - Heart disease
  - Neurological disease such as epilepsy
  - Other chronic disease
8. Does your child receive any daily medication?
9. If "yes" in question 8: What type and dose of medication?
10. Did your child have any of the following symptoms during the period from the date of his/her positive covid test until 2 weeks after the test was positive?
  - Fever
  - A common cold
  - Sore throat
  - Cough
  - Respiratory problems
  - Loss of smell
  - Loss of taste
  - Headache
  - Vomiting
  - Diarrhea
  - Muscle pain
  - Joint pain
  - No symptoms
11. Is it more than 4 weeks since your child tested positive for corona virus for the first time?
12. If "yes" in question 11: Did you child have any of the following symptoms 4 weeks or more after his/her positive corona test?
  - Concentration difficulties
  - Fatigue
  - Dizziness
  - Loss of smell
  - Loss of taste
  - Headache
  - Muscle weakness
  - Muscle pain
  - Joint pain
  - Cough
  - Chest pain
  - Nausea
  - Diarrhea
  - Fever
  - Other symptoms
  - My child did not have any symptoms 4 weeks or more after his/her positive corona test

13. How long did these symptoms last?

1-2 weeks

2-4 weeks

1-2 months

3-4 months

5-6 months

7-8 months

9-10 months

11-12 months

My child still has symptoms

14. Is your child 9 years or older?

15. If “yes” in question 14: Has your child been happy and in a good mood the last two weeks?

All the time

Most of the time

A little more than half of the time

A little less than half of the time

A bit of the time

At no point in time

16. If “yes” in question 14: Has your child felt calm and relaxed the last two weeks?

All the time

Most of the time

A little more than half of the time

A little less than half of the time

A bit of the time

At no point in time

17. If “yes” in question 14: Has your child been full of energy the last two weeks?

All the time

Most of the time

A little more than half of the time

A little less than half of the time

A bit of the time

At no point in time

18. If “yes” in question 14: Has your child awakened feeling well rested the last two weeks?

All the time

Most of the time

A little more than half of the time

A little less than half of the time

A bit of the time

At no point in time

19. If “yes” in question 14: Has your child’s every day life been full of things that interest the child the last two weeks?

All the time

Most of the time

A little more than half of the time

A little less than half of the time

A bit of the time

At no point in time

### Questionnaire for children in the control group

1. Date for completion of the questionnaire?
2. Your child's birth date including year?
3. Gender of your child?
4. Has your child ever been tested positive for SARS-CoV-2 (corona virus)?  
If "yes" in question 4 the questionnaire was terminated without further questions.
5. Does your child suffer from a chronic disease?
6. If "yes" in question 5: What chronic disease?
  - Respiratory disease such as asthma, cystic fibrosis, bronchitis
  - Immune deficiency (confirmed by doctor)
  - Cancer
  - Diabetes
  - Kidney disease
  - Abdominal disease
  - Heart disease
  - Neurological disease such as epilepsy
  - Other chronic disease
7. Does your child receive any daily medication?
8. If "yes" in question 8: What type and dose of medication?
9. Within the last year, did your child have any of the following symptoms that lasted 4 weeks or longer?
  - Concentration difficulties
  - Fatigue
  - Dizziness
  - Loss of smell
  - Loss of taste
  - Headache
  - Muscle weakness
  - Muscle pain
  - Joint pain
  - Cough
  - Chest pain
  - Nausea
  - Diarrhea
  - Fever
  - Other symptoms
  - My child did not have any symptoms
10. How long did these symptoms last in total from the day they started until the day the symptoms ended?
  - 1-2 weeks
  - 2-4 weeks
  - 1-2 months
  - 3-4 months
  - 5-6 months
  - 7-8 months
  - 9-10 months
  - 11-12 months
11. Is your child 9 years or older?
12. If "yes" in question 11: Has your child been happy and in a good mood the last two weeks?
  - All the time
  - Most of the time
  - A little more than half of the time
  - A little less than half of the time
  - A bit of the time
  - At no point in time
13. If "yes" in question 11: Has your child felt calm and relaxed the last two weeks?
  - All the time
  - Most of the time

A little more than half of the time

A little less than half of the time

A bit of the time

At no point in time

14. If “yes” in question 11: Has your child been full of energy the last two weeks?

All the time

Most of the time

A little more than half of the time

A little less than half of the time

A bit of the time

At no point in time

15. If “yes” in question 11: Has your child awakened feeling well rested the last two weeks?

All the time

Most of the time

A little more than half of the time

A little less than half of the time

A bit of the time

At no point in time

16. If “yes” in question 11: Has your child’s every day life been full of things that interest the child the last two weeks?

All the time

Most of the time

A little more than half of the time

A little less than half of the time

A bit of the time

At no point in time

## Supplementary to figure 4, S2

### Long Covid symptoms 0-17 years

| Reported symptom<br>n (%)                   | SARS-CoV-2 positive | Controls     | Total         | P-value |
|---------------------------------------------|---------------------|--------------|---------------|---------|
|                                             | 14883 (49.4)        | 15234 (50.6) | 30117 (100.0) |         |
| Concentration difficulties (Checked), n (%) | 910 (6.1)           | 1408 (9.2)   | 2318 (7.7)    | 0.00    |
| Fatigue (Checked), n (%)                    | 1578 (10.6)         | 654 (4.3)    | 2232 (7.4)    | 0.00    |
| Dizziness (Checked), n (%)                  | 504 (3.4)           | 188 (1.2)    | 692 (2.3)     | 0.00    |
| Respiratory problems (Checked), n (%)       | 611 (4.1)           | 187 (1.2)    | 798 (2.6)     | 0.00    |
| Loss of smell (Checked), n (%)              | 1529 (10.3)         | 19 (0.1)     | 1548 (5.1)    | 0.00    |
| Loss of taste (Checked), n (%)              | 1236 (8.3)          | 16 (0.1)     | 1252 (4.2)    | 0.00    |
| Headache (Checked), n (%)                   | 1033 (6.9)          | 911 (6.0)    | 1944 (6.5)    | 0.00    |
| Muscle weakness (Checked), n (%)            | 373 (2.5)           | 108 (0.7)    | 481 (1.6)     | 0.00    |
| Muscle pain (Checked), n (%)                | 330 (2.2)           | 346 (2.3)    | 676 (2.2)     | 0.75    |
| Joint pain (Checked), n (%)                 | 220 (1.5)           | 274 (1.8)    | 494 (1.6)     | 0.03    |
| Cough (Checked), n (%)                      | 397 (2.7)           | 1017 (6.7)   | 1414 (4.7)    | 0.00    |
| Chest pain (Checked), n (%)                 | 215 (1.4)           | 68 (0.4)     | 283 (0.9)     | 0.00    |
| Nausea (Checked), n (%)                     | 243 (1.6)           | 354 (2.3)    | 597 (2.0)     | 0.00    |
| Diarrhea (Checked), n (%)                   | 100 (0.7)           | 267 (1.8)    | 367 (1.2)     | 0.00    |
| Fever (Checked), n (%)                      | 84 (0.6)            | 333 (2.2)    | 417 (1.4)     | 0.00    |

|                            |       | Risk difference | Lower 95% CI | Upper 95% CI | P value |
|----------------------------|-------|-----------------|--------------|--------------|---------|
| Concentration difficulties | (Yes) | -0.03           | -0.04        | -0.03        | 0.00    |
| Fatigue                    | (Yes) | 0.06            | 0.06         | 0.07         | 0.00    |
| Dizziness                  | (Yes) | 0.02            | 0.02         | 0.02         | 0.00    |
| Respiratory problems       | (Yes) | 0.03            | 0.03         | 0.03         | 0.00    |
| Loss of smell              | (Yes) | 0.10            | 0.10         | 0.11         | 0.00    |
| Loss of taste              | (Yes) | 0.08            | 0.08         | 0.09         | 0.00    |
| Headache                   | (Yes) | 0.01            | 0.00         | 0.02         | 0.00    |
| Muscle weakness            | (Yes) | 0.02            | 0.02         | 0.02         | 0.00    |
| Muscle pain                | (Yes) | -0.00           | -0.00        | 0.00         | 0.75    |
| Joint pain                 | (Yes) | -0.00           | -0.01        | -0.00        | 0.03    |
| Cough                      | (Yes) | -0.04           | -0.04        | -0.04        | 0.00    |
| Chest pain                 | (Yes) | 0.01            | 0.01         | 0.01         | 0.00    |
| Nausea                     | (Yes) | -0.01           | -0.01        | -0.00        | 0.00    |
| Diarrhea                   | (Yes) | -0.01           | -0.01        | -0.01        | 0.00    |
| Fever                      | (Yes) | -0.02           | -0.02        | -0.01        | 0.00    |

### Long Covid symptoms 0-5 years

| Reported symptom<br>n (%)                   | SARS-CoV-2 positive | Controls    | Total        | P-value |
|---------------------------------------------|---------------------|-------------|--------------|---------|
|                                             | 2950 (30.1)         | 6856 (69.9) | 9806 (100.0) |         |
| Concentration difficulties (Checked), n (%) | 40 (1.4)            | 173 (2.5)   | 213 (2.2)    | 0.00    |
| Fatigue (Checked), n (%)                    | 193 (6.5)           | 135 (2.0)   | 328 (3.3)    | 0.00    |
| Dizziness (Checked), n (%)                  | 6 (0.2)             | 11 (0.2)    | 17 (0.2)     | 0.64    |
| Respiratory problems (Checked), n (%)       | 41 (1.4)            | 80 (1.2)    | 121 (1.2)    | 0.36    |
| Loss of smell (Checked), n (%)              | 31 (1.1)            | 3 (0.0)     | 34 (0.3)     | 0.00    |
| Loss of taste (Checked), n (%)              | 39 (1.3)            | 4 (0.1)     | 43 (0.4)     | 0.00    |
| Headache (Checked), n (%)                   | 49 (1.7)            | 76 (1.1)    | 125 (1.3)    | 0.03    |
| Muscle weakness (Checked), n (%)            | 20 (0.7)            | 12 (0.2)    | 32 (0.3)     | 0.00    |
| Muscle pain (Checked), n (%)                | 24 (0.8)            | 51 (0.7)    | 75 (0.8)     | 0.72    |
| Joint pain (Checked), n (%)                 | 28 (0.9)            | 38 (0.6)    | 66 (0.7)     | 0.03    |
| Cough (Checked), n (%)                      | 142 (4.8)           | 759 (11.1)  | 901 (9.2)    | 0.00    |
| Chest pain (Checked), n (%)                 | 10 (0.3)            | 9 (0.1)     | 19 (0.2)     | 0.03    |
| Nausea (Checked), n (%)                     | 19 (0.6)            | 63 (0.9)    | 82 (0.8)     | 0.17    |
| Diarrhea (Checked), n (%)                   | 25 (0.8)            | 134 (2.0)   | 159 (1.6)    | 0.00    |
| Fever (Checked), n (%)                      | 34 (1.2)            | 237 (3.5)   | 271 (2.8)    | 0.00    |

|                            |       | Risk difference | Lower 95% CI | Upper 95% CI | P value |
|----------------------------|-------|-----------------|--------------|--------------|---------|
| Concentration difficulties | (Yes) | -0.01           | -0.02        | -0.01        | 0.00    |
| Fatigue                    | (Yes) | 0.05            | 0.04         | 0.06         | 0.00    |
| Dizziness                  | (Yes) | 0.00            | -0.00        | 0.00         | 0.65    |
| Respiratory problems       | (Yes) | 0.00            | -0.00        | 0.01         | 0.38    |
| Loss of smell              | (Yes) | 0.01            | 0.01         | 0.01         | 0.00    |
| Loss of taste              | (Yes) | 0.01            | 0.01         | 0.02         | 0.00    |
| Headache                   | (Yes) | 0.01            | 0.00         | 0.01         | 0.04    |
| Muscle weakness            | (Yes) | 0.01            | 0.00         | 0.01         | 0.00    |
| Muscle pain                | (Yes) | 0.00            | -0.00        | 0.00         | 0.72    |
| Joint pain                 | (Yes) | 0.00            | 0.00         | 0.01         | 0.05    |
| Cough                      | (Yes) | -0.06           | -0.07        | -0.05        | 0.00    |
| Chest pain                 | (Yes) | 0.00            | -0.00        | 0.00         | 0.07    |
| Nausea                     | (Yes) | -0.00           | -0.01        | 0.00         | 0.14    |
| Diarrhea                   | (Yes) | -0.01           | -0.02        | -0.01        | 0.00    |
| Fever                      | (Yes) | -0.02           | -0.03        | -0.02        | 0.00    |

### Long Covid symptoms 6-17 years

| Reported symptom                            | SARS-CoV-2 positive | Controls    | Total         | P-value |
|---------------------------------------------|---------------------|-------------|---------------|---------|
| n (%)                                       | 11933 (58.8)        | 8378 (41.2) | 20311 (100.0) |         |
| Concentration difficulties (Checked), n (%) | 870 (7.3)           | 1235 (14.7) | 2105 (10.4)   | 0.00    |
| Fatigue (Checked), n (%)                    | 1385 (11.6)         | 519 (6.2)   | 1904 (9.4)    | 0.00    |
| Dizziness (Checked), n (%)                  | 498 (4.2)           | 177 (2.1)   | 675 (3.3)     | 0.00    |
| Respiratory problems (Checked), n (%)       | 570 (4.8)           | 107 (1.3)   | 677 (3.3)     | 0.00    |
| Loss of smell (Checked), n (%)              | 1498 (12.6)         | 16 (0.2)    | 1514 (7.5)    | 0.00    |
| Loss of taste (Checked), n (%)              | 1197 (10.0)         | 12 (0.1)    | 1209 (6.0)    | 0.00    |
| Headache (Checked), n (%)                   | 984 (8.2)           | 835 (10.0)  | 1819 (9.0)    | 0.00    |
| Muscle weakness (Checked), n (%)            | 353 (3.0)           | 96 (1.1)    | 449 (2.2)     | 0.00    |
| Muscle pain (Checked), n (%)                | 306 (2.6)           | 295 (3.5)   | 601 (3.0)     | 0.00    |
| Joint pain (Checked), n (%)                 | 192 (1.6)           | 236 (2.8)   | 428 (2.1)     | 0.00    |
| Cough (Checked), n (%)                      | 255 (2.1)           | 258 (3.1)   | 513 (2.5)     | 0.00    |
| Chest pain (Checked), n (%)                 | 205 (1.7)           | 59 (0.7)    | 264 (1.3)     | 0.00    |
| Nausea (Checked), n (%)                     | 224 (1.9)           | 291 (3.5)   | 515 (2.5)     | 0.00    |
| Diarrhea (Checked), n (%)                   | 75 (0.6)            | 133 (1.6)   | 208 (1.0)     | 0.00    |
| Fever (Checked), n (%)                      | 50 (0.4)            | 96 (1.1)    | 146 (0.7)     | 0.00    |

|                            |       | Risk difference | Lower 95% CI | Upper 95% CI | P value |
|----------------------------|-------|-----------------|--------------|--------------|---------|
| Concentration difficulties | (Yes) | -0.07           | -0.08        | -0.07        | 0.00    |
| Fatigue                    | (Yes) | 0.05            | 0.05         | 0.06         | 0.00    |
| Dizziness                  | (Yes) | 0.02            | 0.02         | 0.03         | 0.00    |
| Respiratory problems       | (Yes) | 0.03            | 0.03         | 0.04         | 0.00    |
| Loss of smell              | (Yes) | 0.12            | 0.12         | 0.13         | 0.00    |
| Loss of taste              | (Yes) | 0.10            | 0.09         | 0.10         | 0.00    |
| Headache                   | (Yes) | -0.02           | -0.03        | -0.01        | 0.00    |
| Muscle weakness            | (Yes) | 0.02            | 0.01         | 0.02         | 0.00    |
| Muscle pain                | (Yes) | -0.01           | -0.01        | -0.00        | 0.00    |
| Joint pain                 | (Yes) | -0.01           | -0.02        | -0.01        | 0.00    |
| Cough                      | (Yes) | -0.01           | -0.01        | -0.00        | 0.00    |
| Chest pain                 | (Yes) | 0.01            | 0.01         | 0.01         | 0.00    |
| Nausea                     | (Yes) | -0.02           | -0.02        | -0.01        | 0.00    |
| Diarrhea                   | (Yes) | -0.01           | -0.01        | -0.01        | 0.00    |
| Fever                      | (Yes) | -0.01           | -0.01        | -0.00        | 0.00    |
